# Supplementary material for: Nanogel-antimiR-31 conjugates affect colon cancer cells behaviour
Source: Royal Society of Chemistry journal article supplement (doi:10.1039/c7ra09797b), 2017-01-01
Supplement: c7ra09797b1.pdf [file c7ra09797b1.pdf]

Supplementary

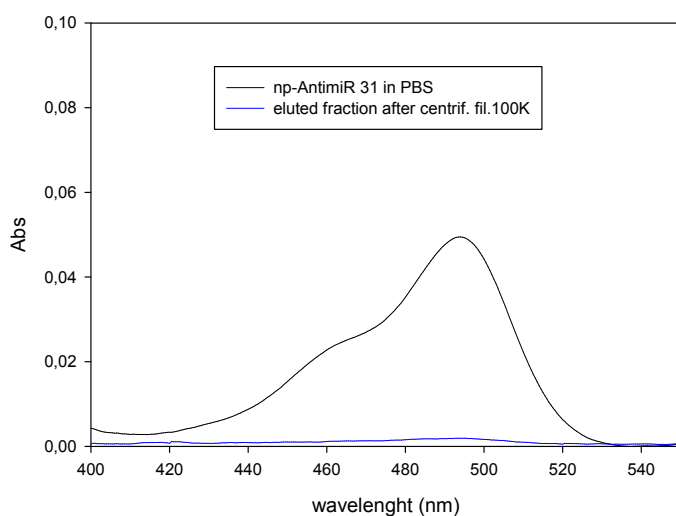

**Fig S1.** UV-vis absorption spectra of NG-AntimiR-31 IC and its eluted fraction after incubation for 24 h in isotonic PBS at 37°C and centrifuge filtration (MWCO 100 kDa).

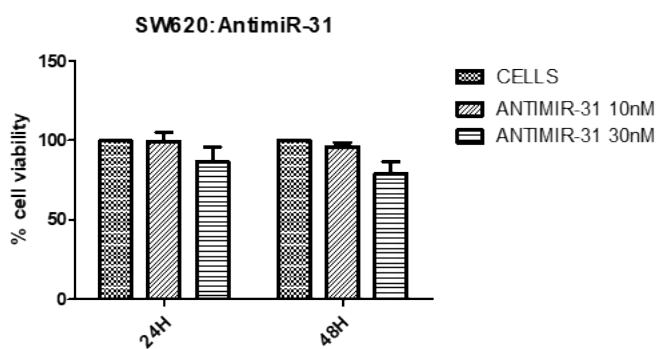

**Fig S2.** Results of cell viability of SW620 cells treated with different concentrations of AntimiR.
